# Supplementary material for: Flexible top-emitting organic light emitting diodes with a functional dielectric reflector on a metal foil substrate
Source: Royal Society of Chemistry journal article supplement (doi:10.1039/c8ra05759a), 2018-01-01
Supplement: c8ra05759a1.pdf [file c8ra05759a1.pdf]

## Supporting Information

### Flexible Top-Emitting Organic Light Emitting Diodes with Functional Dielectric

#### Reflector on Metal Foil Substrate

Kihyon Hong\*, Hak Ki Yu, Illhwan Lee, Sungjun Kim, Youngho Kim, Kisoo Kim, and Jong-Lam Lee\*

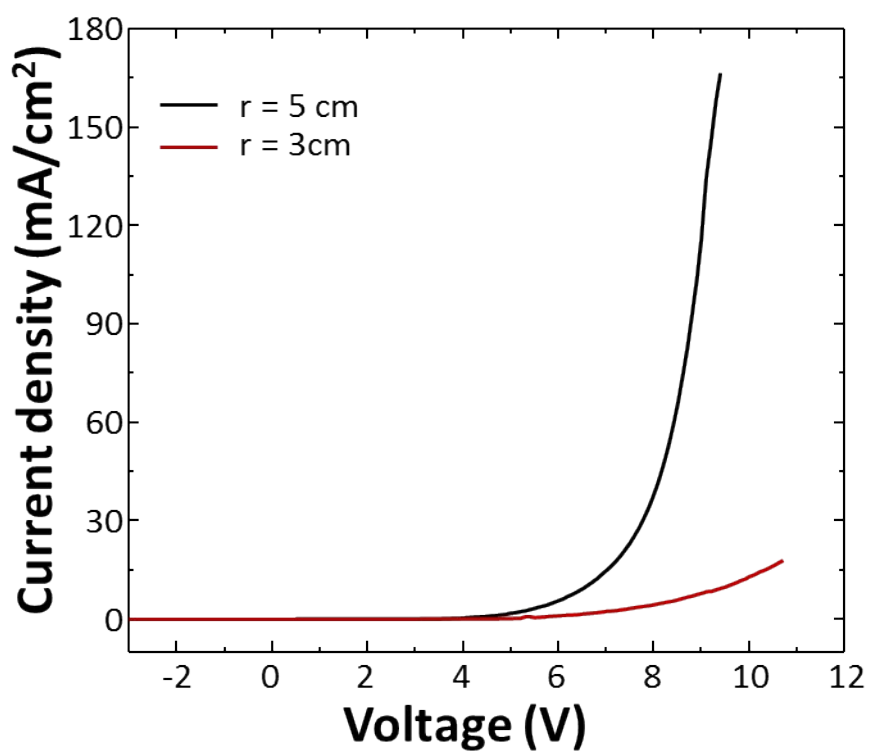

Figure S1  $J$ - $V$  characteristics of TOLEDs with DBR under different mechanical bending radius,  $r = 5$  and  $3$  cm.
